# Supplementary material
Source: PubMed Central journal article supplement (PMC9685890)
Supplement: 13059_2022_2811_MOESM1_ESM.pdf [file 13059_2022_2811_MOESM1_ESM.pdf]

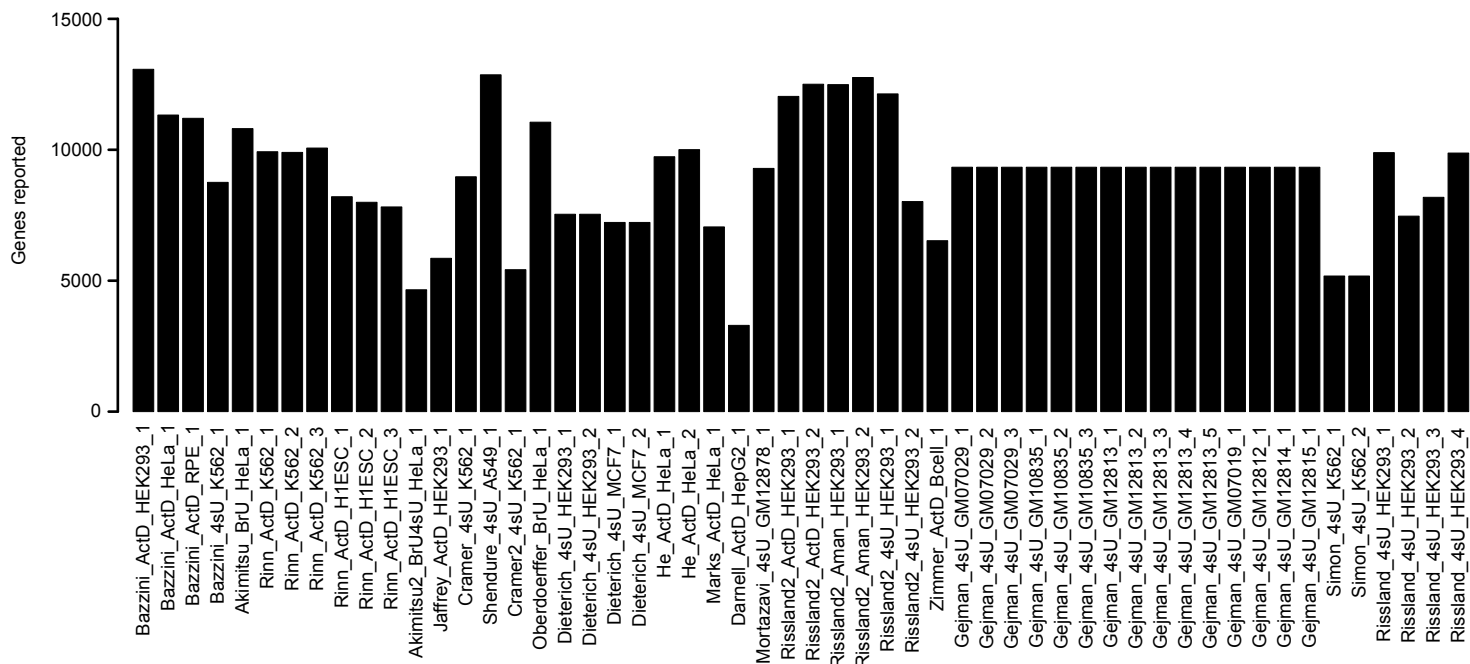

**Fig S1. Variability in genes reported in different human half-life datasets.**

Barplot of the number of genes whose half-lives were reported in each of 54 human samples. Each sample ID is delimited by underscores and listed according to its study of origin (**Table 1**), measurement method, cell type, and replicate number.

**a**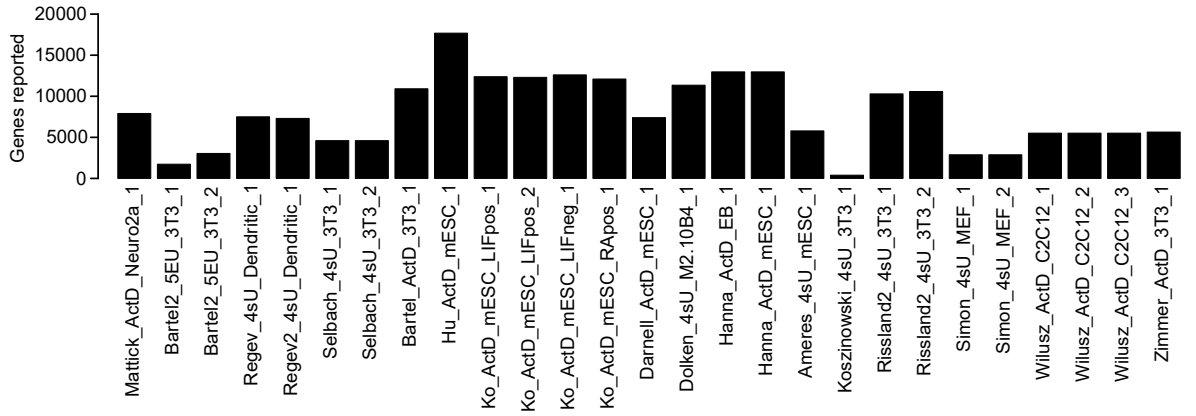**b**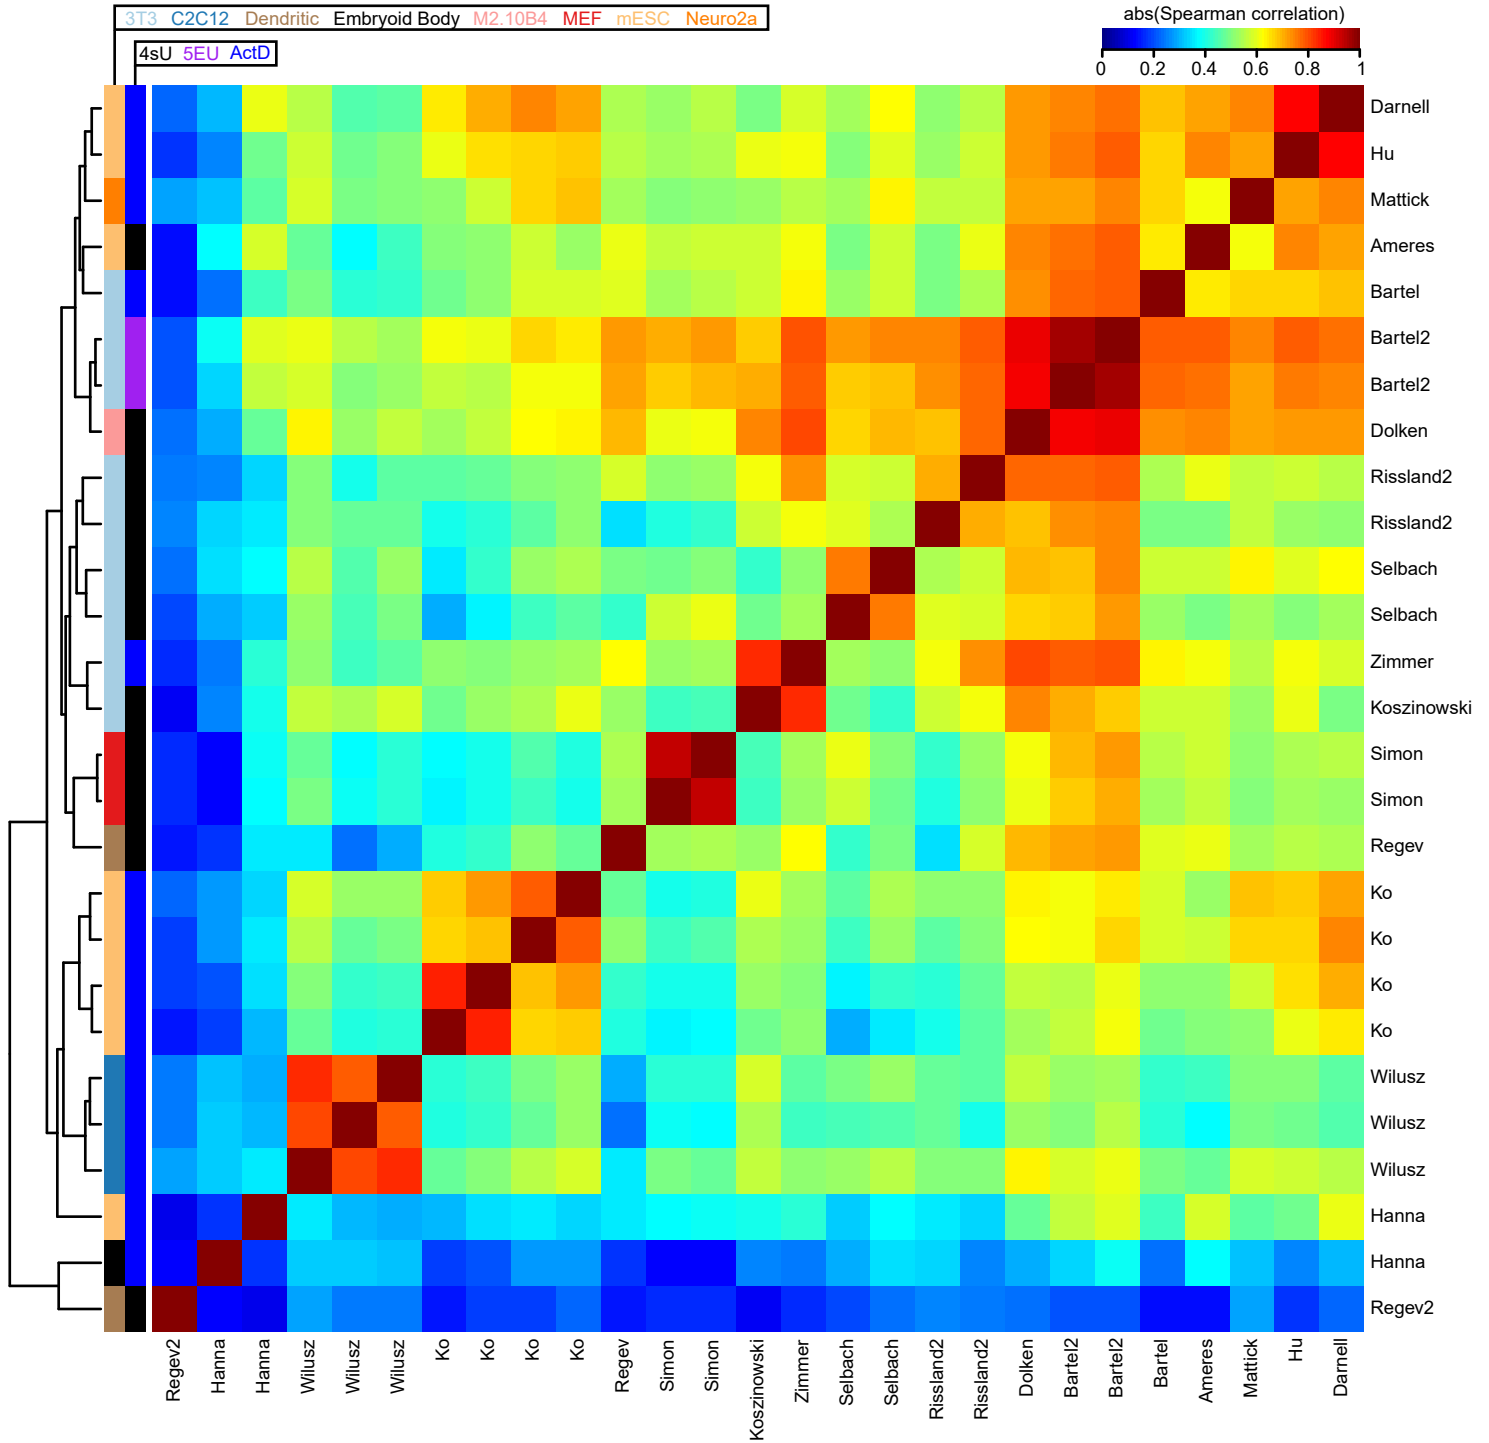

**Fig S2. Comparison of half-lives in a compendium of mouse datasets.**

**a)** Barplot of the number of genes whose half-lives were reported in each of 27 mouse samples. Each sample ID is delimited by underscores and listed according to its study of origin (**Table 1**), measurement method, cell type, and replicate number. **b)** Heatmap of the absolute value of the Spearman correlations measured between half-lives derived from each pair of 27 mouse samples. Samples are clustered using hierarchical clustering according to the indicated dendrogram. Rows are labeled by the study of origin (**Table 1**) and colored by the cell type of origin and measurement approach.

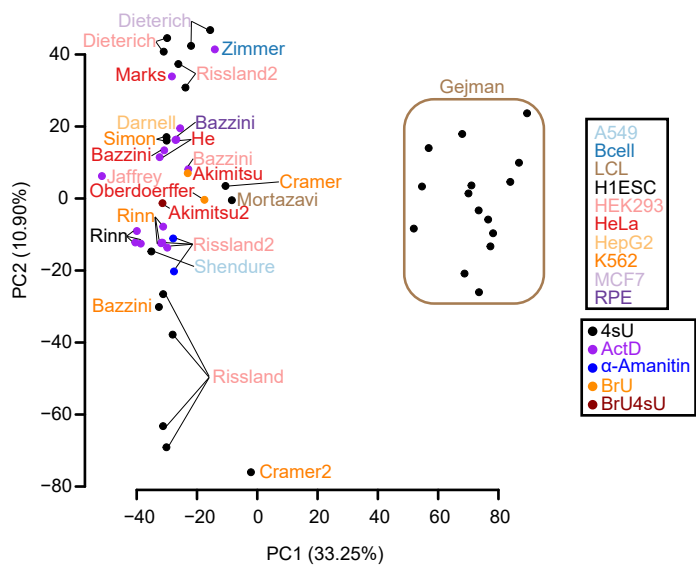

**Fig S3. Relationship among human samples.**

This figure is similar to **Fig. 2a**, except that it shows all human samples evaluated in this study.

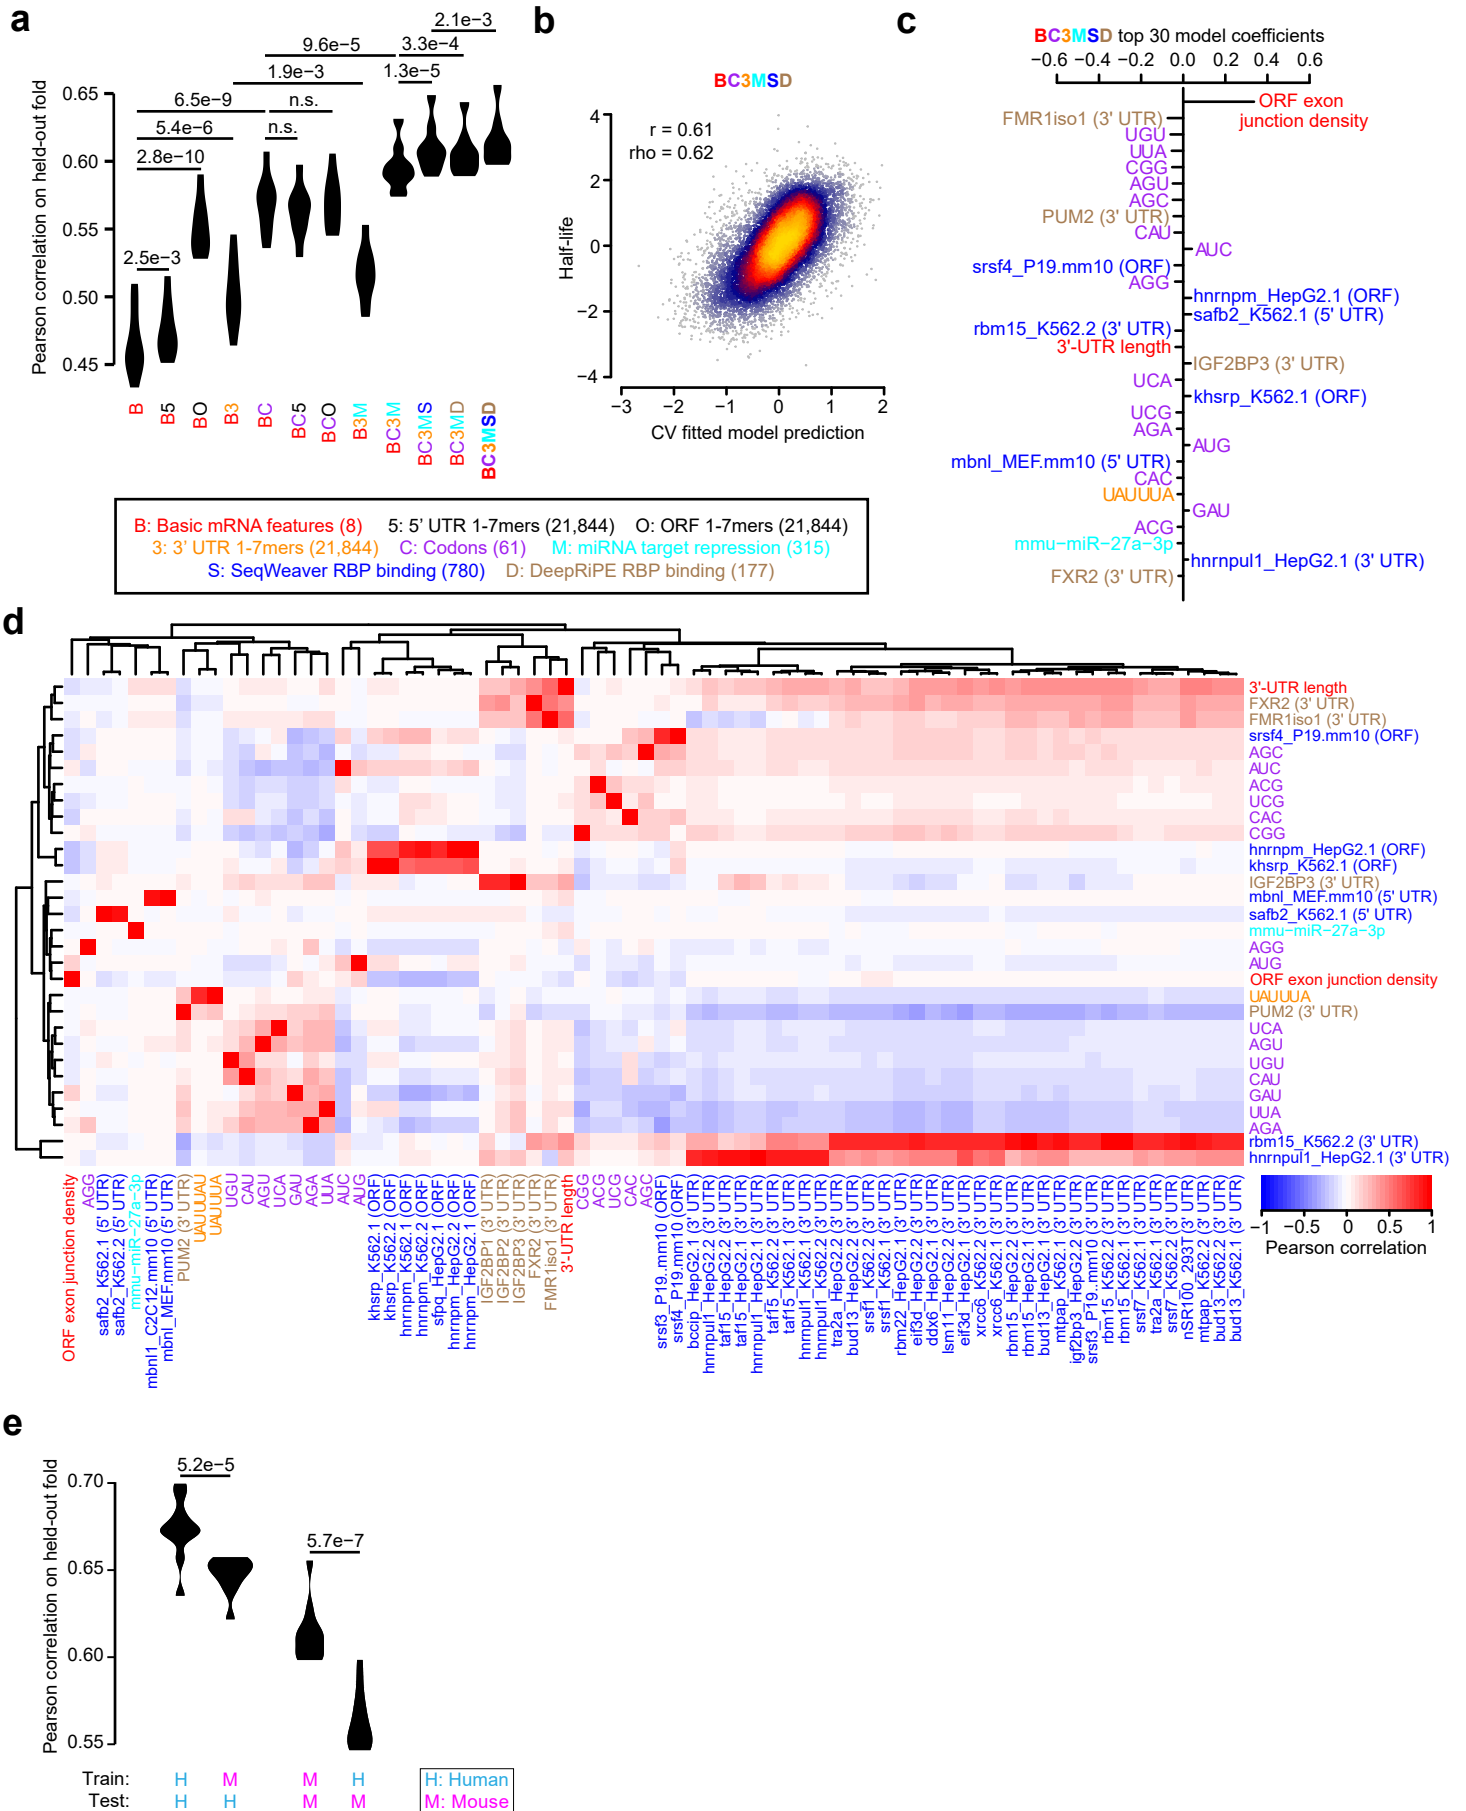

**Fig S4. Prediction of mouse half-lives using sequence-encoded features.**

**a-d)** These panels are organized in the same fashion as **Fig. 3a-d**, except that they evaluate features benchmarked upon mouse data rather than human data. **e)** Performance of trained human and mouse models on test sets derived from either the same or different species. Due to the imperfect one-to-one miRNA mappings between the human and mouse, miRNA-related coefficients were excluded from the inter-species predictions. Each statistical comparison shown was evaluated with a paired t-test.

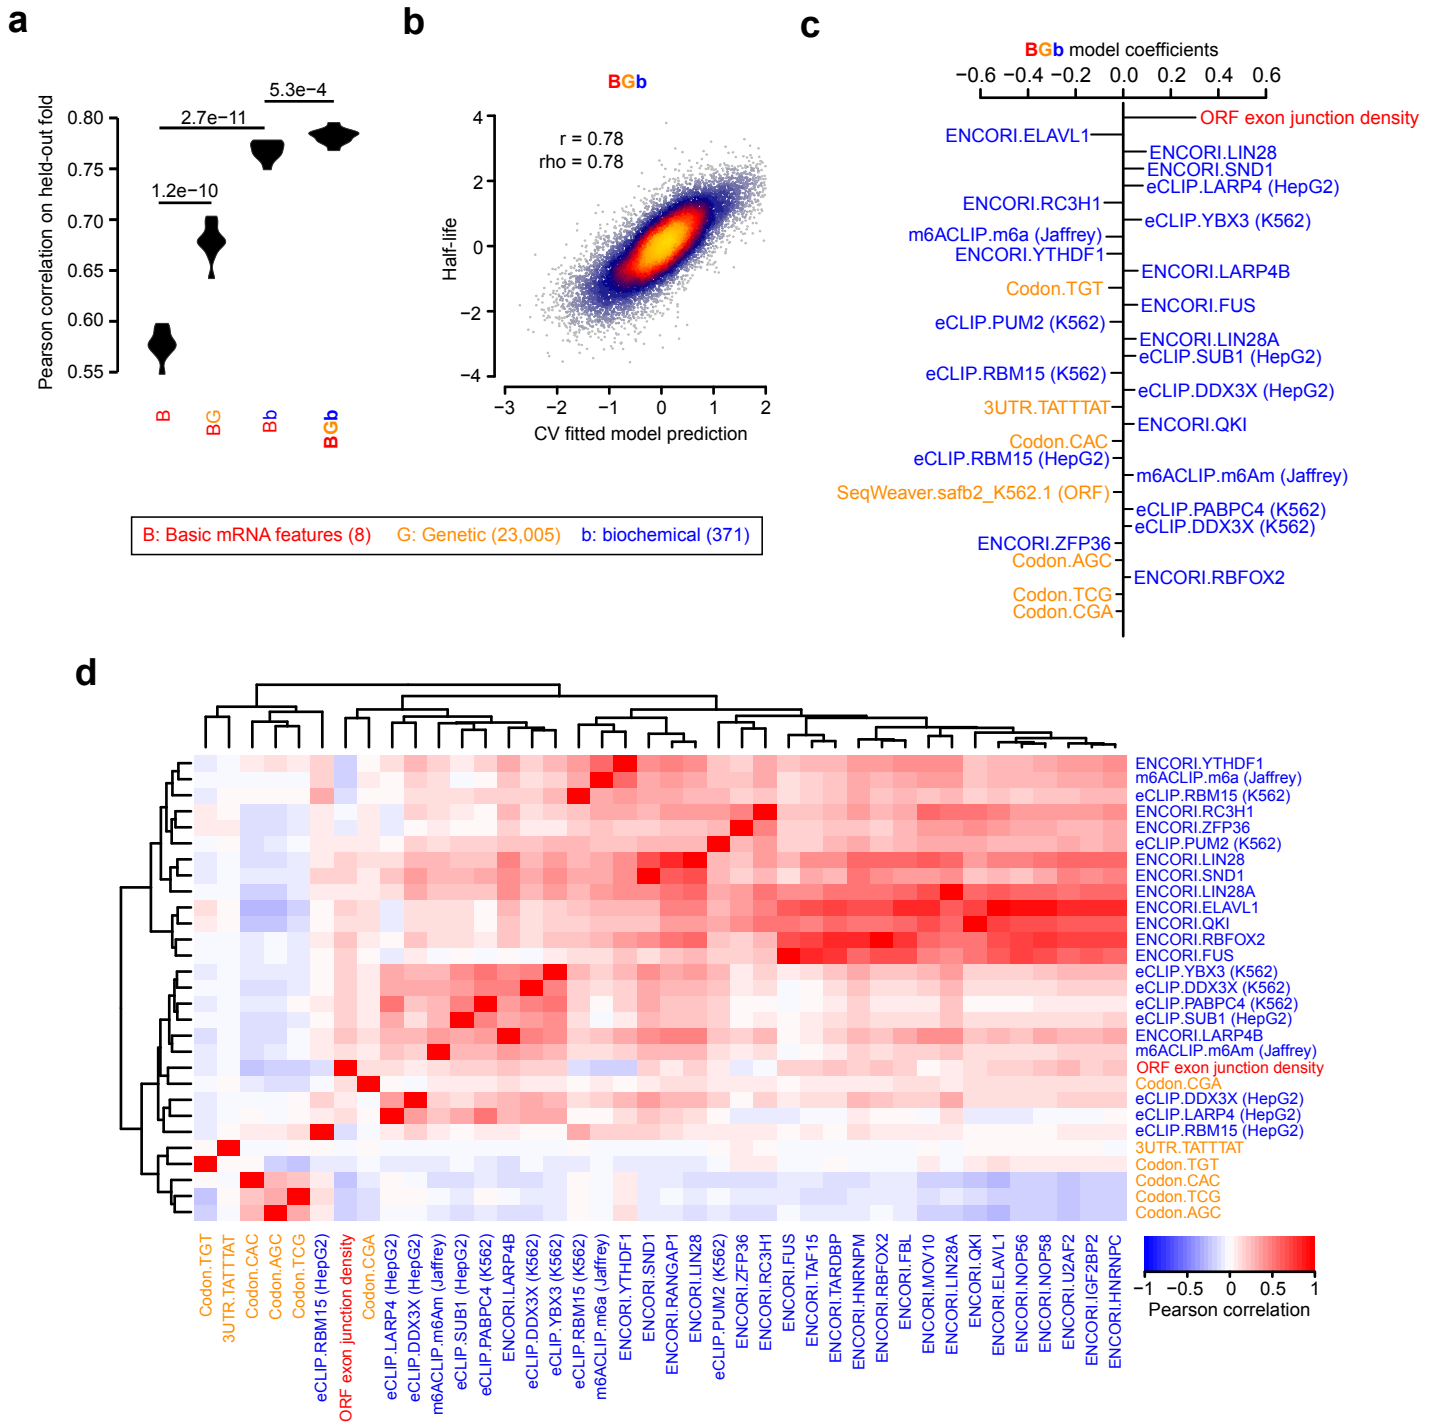

**Fig S5. Prediction of mouse half-lives using biochemical and sequence-encoded features.**

This figure is organized in the same fashion as **Fig. 3-4**, except that it evaluates the subset of optimal genetic features (BC3MS model, **Fig. 3**), optimal biochemical features (BEeM model, **Fig. 4**), or a combination of both genetic and biochemical features. The features shown in panels (c-d) are described alongside their corresponding source, such as eCLIP, SeqWeaver, or codon features.

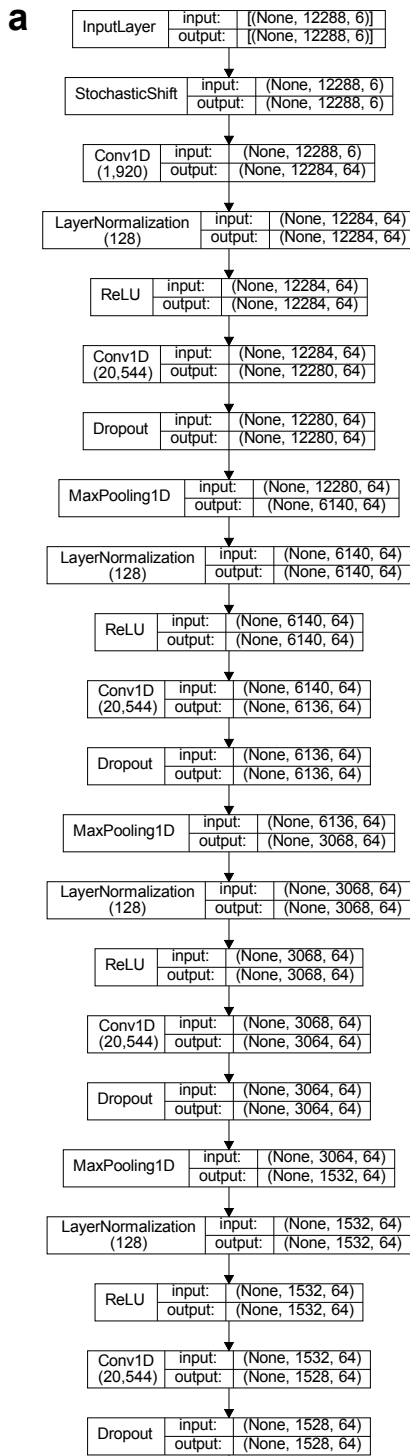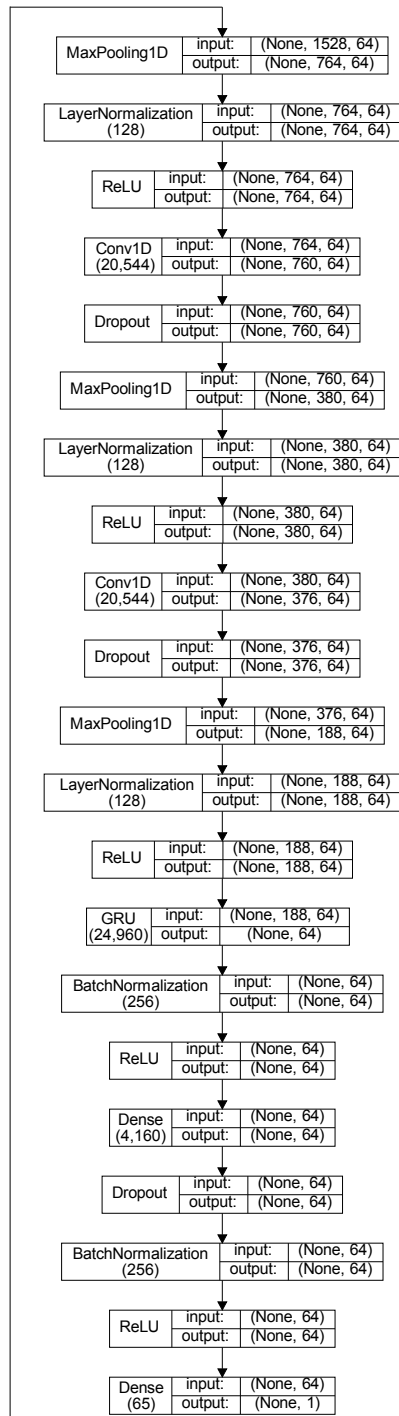

Total parameters: 155,777 Trainable parameters: 155,521 Non-trainable parameters: 256

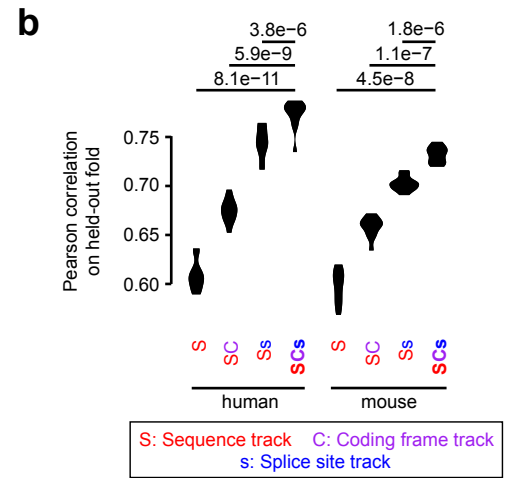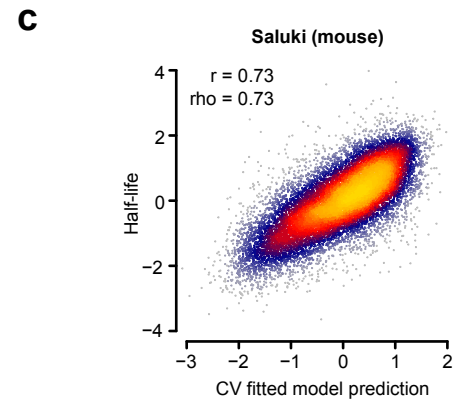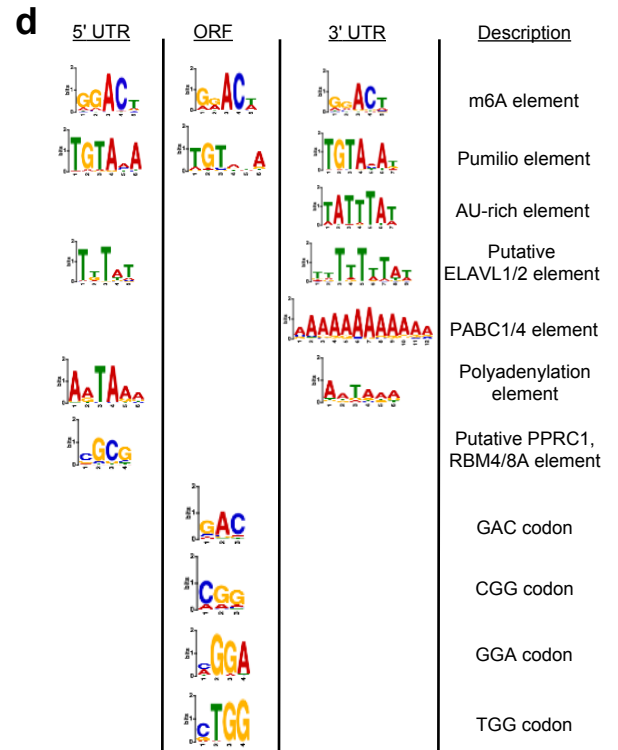



**Fig S6. Performance and interpretation of Saluki.**

**a)** Complete architecture of the Saluki model. Indicated for each layer is the layer name, number of parameters in parentheses when applicable, and dimensionality of the input and output matrices. **b)** Performance of trained Saluki models on each of 10 held-out folds of data. Compared is the relative performance between pairs of models, for both human and mouse species, which iteratively consider additional input tracks. Each model is described by a code indicating the input track considered. A description of the code is provided in the key. An improvement in a more complex model relative to a simpler model was evaluated with a one-sided, paired t-test, adjusted with a Bonferroni correction to account for the total number of hypothesis tests. **c)** This panel is organized in the same fashion as **Fig. 5c**, except that it evaluates the performance on mouse data rather than human data. **d)** Set of enriched motifs discovered by TF-MoDISco [84] in each of the three functional regions of an mRNA.

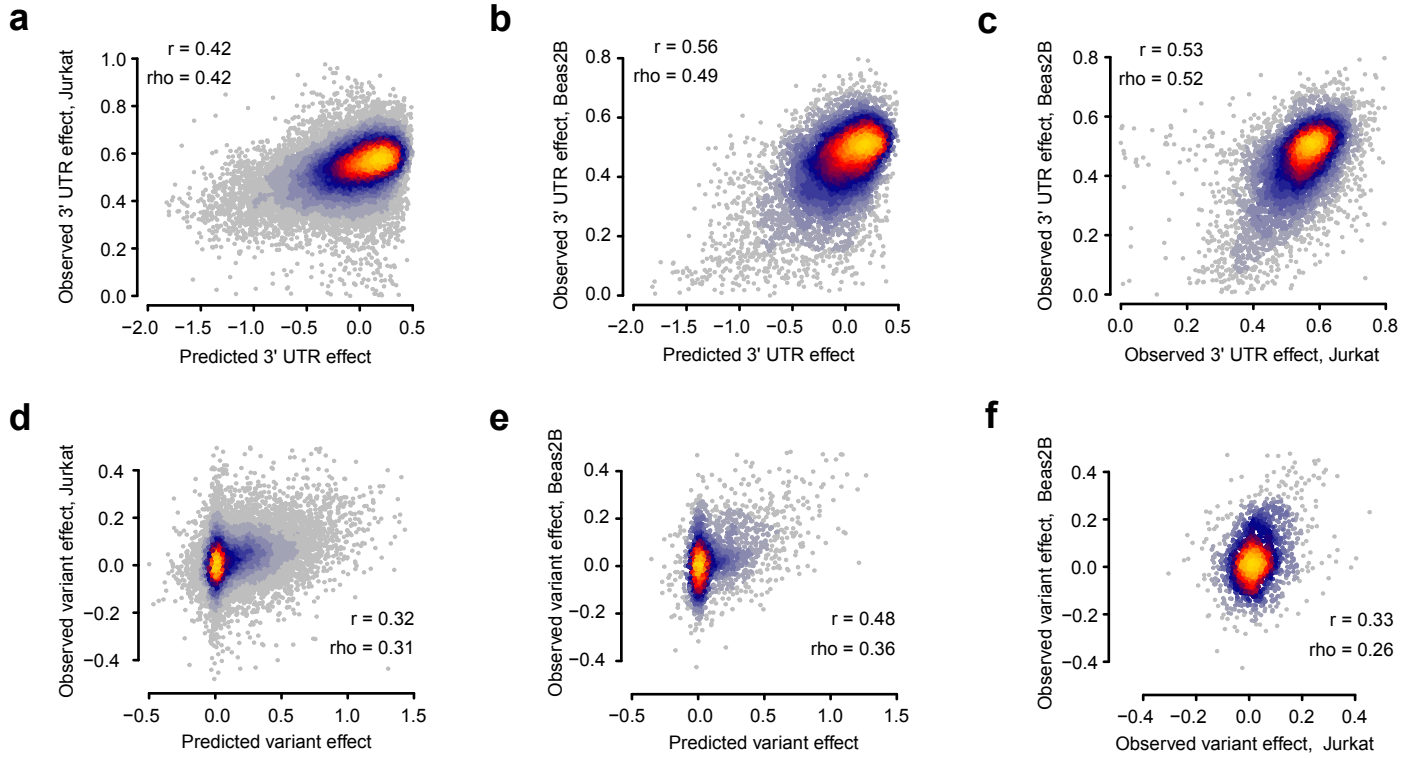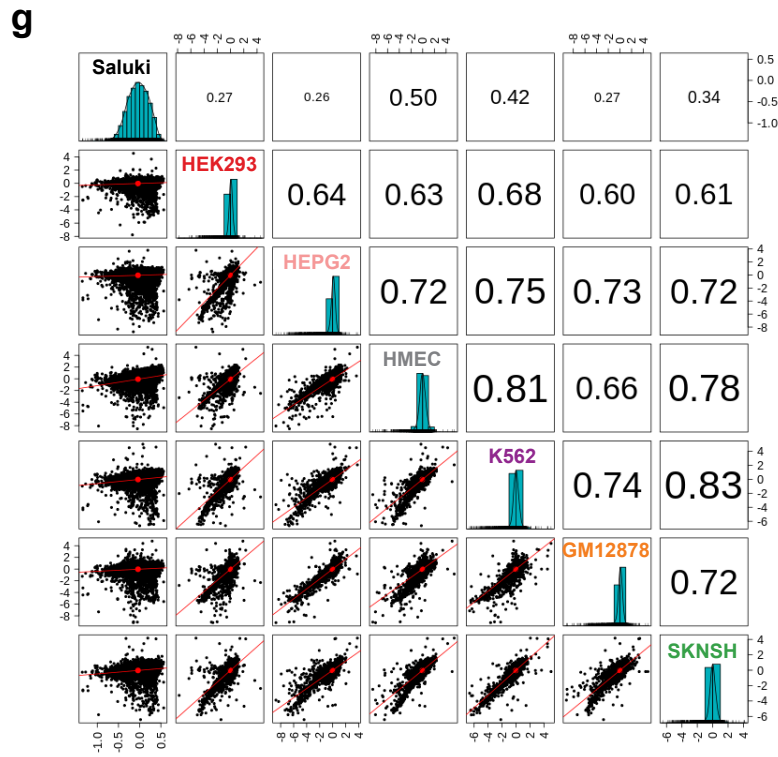

**Fig S7. Concordance of Saluki predictions and additional functional data from massively parallel reporter assays.**

**a-c)** Scatter plot of the observed and predicted 3'-UTR effects, as measured in a) Jurkat cells or b) Beas2B cells, alongside c) a plot of observed 3'-UTR effects between the pair of cell types [88]. **d-f)** These panels are organized like panels (a-c), but display variant effects instead of 3'-UTR effects [88]. Panel e) is identical to that shown in **Fig. 6e** and reproduced here for convenience. Also indicated are the Pearson ( $r$ ) and Spearman ( $\rho$ ) correlation values for panels (a-f). **g)** Scatter matrix displaying scatter plots corresponding to each of the 21 pairs of possible comparisons (lower diagonal elements) involving Saluki predictions as well as the measured stability effects for 3'-UTR fragments measured in each of six cell types [89]. Shown on the diagonal is a histogram of the predicted or observed RNA half-life scores. Also shown are Spearman correlation values among each pair of comparisons, with the size of the text proportional to the magnitude of the correlation coefficient (upper diagonal elements).

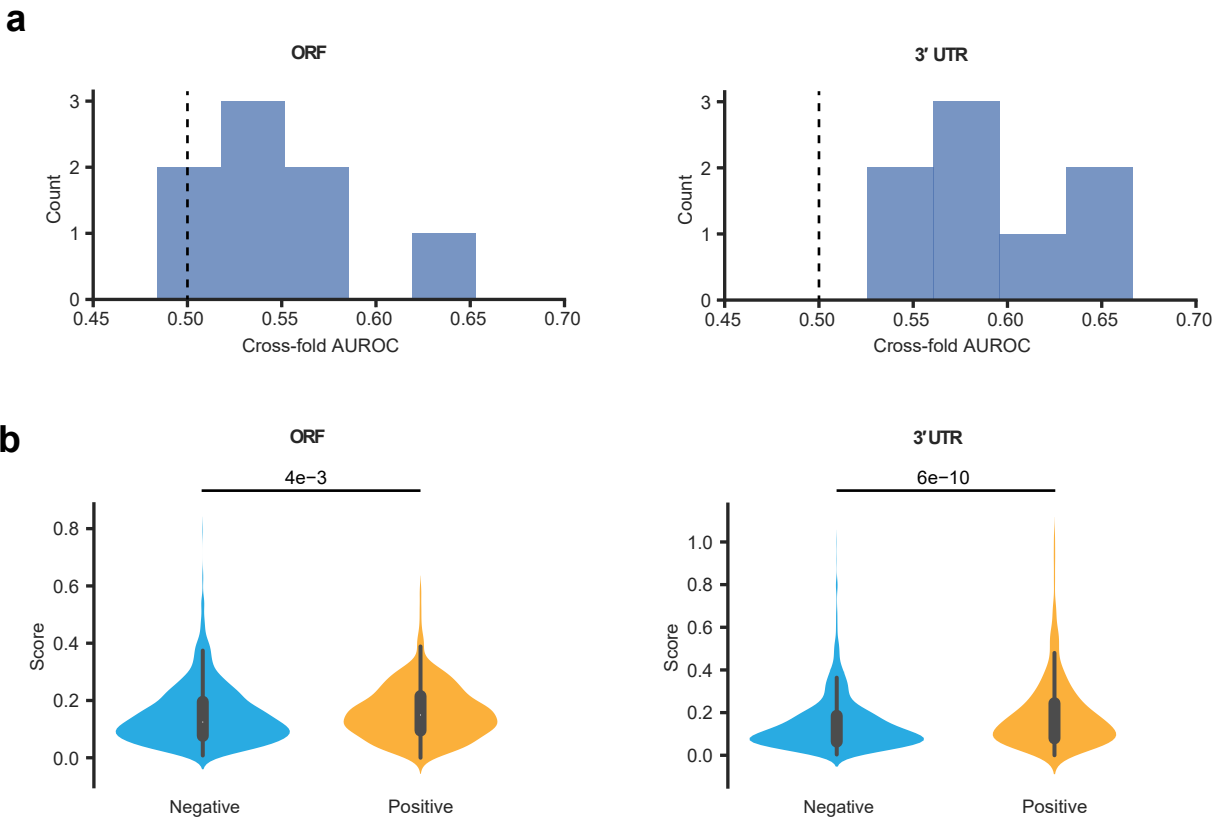

**Fig S8. Performance of Saluki on the prediction of fine-mapped eQTLs.**

**a)** Performance of Saluki predictions in classifying likely causal eQTLs from a negative set of gene-expression-level-matched eQTLs that are unlikely to be causal. Plotted are histograms showing the AUROCs for each of 8 folds of data for both ORF ( $n=352$ ) and 3'-UTR ( $n=541$ ) variants. Both distributions are significantly greater than the expected performance of a random predictor (dashed line); with p-values of  $3.5e-2$  and  $1e-4$  for ORFs and 3' UTRs, respectively, as evaluated using a binomial test. **b)** Violin plots showing the distributions of the absolute values of the change in predicted Saluki scores for the mutant and wild-type allele, corresponding to both the positive and negative sets of likely causal variants. Also shown are p-values indicating the statistical differences between distributions as evaluated using a two-sided Wilcoxon rank-sum test.
